# Supplementary material for: Transcriptomic Analysis of Ciguatoxin-Induced Changes in Gene Expression in Primary Cultures of Mice Cortical Neurons
Source: MDPI journal article supplement (doi:10.3390/toxins10050192), 2018-05-10
Supplement: s1 [file s1]

# Supplementary Materials: Transcriptomic Analysis of Ciguatoxin-Induced Changes in Gene Expression in Primary Cultures of Mice Cortical Neurons

Juan Andrés Rubiolo, Carmen Vale, Andrea Boente-Juncal, Masahiro Hirama, Shuji Yamashita, Mercedes Camiña, Mercedes R. Vieytes and Luis M. Botana

Supplementary table 1. Biological processes altered by CTX identified by gene ontology analysis.

| Category                            | Term                                                            | Count | P Value  | Genes                                                                                                                                                                                                                                                                                                                                                                                                                                                                                                                                                                                                                                                                                                                                                                                                                                                                                                                                                                   |
|-------------------------------------|-----------------------------------------------------------------|-------|----------|-------------------------------------------------------------------------------------------------------------------------------------------------------------------------------------------------------------------------------------------------------------------------------------------------------------------------------------------------------------------------------------------------------------------------------------------------------------------------------------------------------------------------------------------------------------------------------------------------------------------------------------------------------------------------------------------------------------------------------------------------------------------------------------------------------------------------------------------------------------------------------------------------------------------------------------------------------------------------|
| Down-regulated biological processes |                                                                 |       |          |                                                                                                                                                                                                                                                                                                                                                                                                                                                                                                                                                                                                                                                                                                                                                                                                                                                                                                                                                                         |
| 24 hs                               |                                                                 |       |          |                                                                                                                                                                                                                                                                                                                                                                                                                                                                                                                                                                                                                                                                                                                                                                                                                                                                                                                                                                         |
| GOTERM_BP_FAT                       | GO:0007186-G-protein coupled receptor protein signaling pathway | 93    | 5,76E-10 | NM_146348, NM_134180, NM_146347, NM_146843, NM_146807, NM_147055, NM_001011831, NM_146698, NM_029525, NM_146871, NM_146609, NM_030739, NM_007719, NM_146796, NM_001011531, NM_001104573, NM_153067, NM_001104575, NM_146523, NM_001166710, NM_198961, NM_146895, NM_146526, NM_009835, NM_009314, NM_146525, NM_146524, NM_001166719, NM_001165944, NM_001011866, NM_146529, NM_147006, NM_207254, NM_146903, NM_146944, NM_182714, NM_001105065, NM_001105067, NM_001104562, NM_146825, NM_146826, NM_205810, NM_146366, NM_001011859, NM_146827, NM_030712, NM_203490, NM_207546, NM_009915, NM_146829, NM_181817, NM_009916, NM_001011807, NM_146982, NM_207543, XM_001475614, NM_147075, NM_147034, NM_001166727, NM_053093, NM_203492, NM_146729, NM_001011519, NM_176996, NM_147002, NM_146277, NM_001011811, NM_146776, NM_146975, AK143547, NM_175669, NM_134231, NM_001105152, NM_053220, NM_001105156, NM_146691, NM_134173, NM_146873, NM_134436, NM_134177, |

|               |                                                                |     |          |  |                                                                                                                                                                                                                                                                                                                                                                                                                                                                                                                                                                                                                                                                                                                                                                                                                                                                                                                                                                                                                                                                                                                   |
|---------------|----------------------------------------------------------------|-----|----------|--|-------------------------------------------------------------------------------------------------------------------------------------------------------------------------------------------------------------------------------------------------------------------------------------------------------------------------------------------------------------------------------------------------------------------------------------------------------------------------------------------------------------------------------------------------------------------------------------------------------------------------------------------------------------------------------------------------------------------------------------------------------------------------------------------------------------------------------------------------------------------------------------------------------------------------------------------------------------------------------------------------------------------------------------------------------------------------------------------------------------------|
|               |                                                                |     |          |  | NM_001011740, NM_146508, NM_134175, NM_134169,<br>NM_146747, XM_001481325, NM_134167, NM_001104540,<br>NM_206868, NM_001039652, NM_146689, NM_146926,<br>NM_133720, Y15524, NM_007538, NM_146644, NM_207132,<br>NM_146311, NM_028910                                                                                                                                                                                                                                                                                                                                                                                                                                                                                                                                                                                                                                                                                                                                                                                                                                                                              |
|               |                                                                |     |          |  | NM_134180, NM_146843, NM_029525, NM_146871, NM_145467,<br>NM_001082960, NM_026505, NM_007719, NM_146796,<br>NM_001104573, NM_008006, NM_001104575, NM_146523,<br>NM_001166710, NM_146526, NM_009314, NM_009835,<br>NM_146525, NM_146524, NM_001166719, NM_001011866,<br>NM_010204, NM_146529, NM_147006, NM_146903, NM_182714,<br>NM_001105065, NM_001105067, NM_001104562, NM_146825,<br>NM_146826, NM_146827, NM_030712, NM_203490, NM_009915,<br>NM_146829, NM_009916, NM_001011807, NM_146982,<br>NM_147075, NM_001166727, NM_053116, NM_053093,<br>NM_203492, NM_146729, NM_007950, NM_147002, NM_146277,<br>NM_022657, NM_001011811, NM_146776, NM_010228,<br>NM_146975, AK143547, NM_053220, NM_146691, NM_134173,<br>NM_146873, NM_134436, NM_134177, NM_001011740,<br>NM_144955, NM_146508, NM_134175, NM_134169, XM_001481325,<br>NM_134167, NM_206868, NM_146926, NM_146689, NM_007538,<br>NM_207132, NM_146311, NM_001033228, NM_028910,<br>NM_146348, NM_146347, NM_146807, NM_147055,<br>NM_001011831, NM_146698, NM_146609, NM_145745,<br>NM_030739, NM_001011531, NM_153067, AK138305, NM_198961, |
| GOTERM_BP_FAT | GO:0007166~cell surface receptor<br>linked signal transduction | 111 | 3,41E-09 |  |                                                                                                                                                                                                                                                                                                                                                                                                                                                                                                                                                                                                                                                                                                                                                                                                                                                                                                                                                                                                                                                                                                                   |

|               |                               |    |          |  |                                                                                                                                                                                                                                                                                                                                                                                                                                                                                                                                                                                                                                                                                                                                                                                |
|---------------|-------------------------------|----|----------|--|--------------------------------------------------------------------------------------------------------------------------------------------------------------------------------------------------------------------------------------------------------------------------------------------------------------------------------------------------------------------------------------------------------------------------------------------------------------------------------------------------------------------------------------------------------------------------------------------------------------------------------------------------------------------------------------------------------------------------------------------------------------------------------|
|               |                               |    |          |  | NM_146895, NM_001165944, NM_207254, AK012979, NM_030614, NM_146944, NM_205810, NM_146366, NM_001011859, NM_207546, NM_181817, NM_207543, XM_001475614, NM_147034, NM_001011519, NM_176996, NM_001043317, NM_175669, NM_134231, NM_001105152, NM_001105156, NM_031180, NM_146747, NM_001104540, NM_001039652, NM_133720, NM_008011, Y15524, NM_146644                                                                                                                                                                                                                                                                                                                                                                                                                           |
|               |                               |    |          |  | NM_146348, NM_146347, AK016832, NM_146843, NM_146807, NM_001142747, NM_147055, NM_001011831, NM_146698, NM_013624, NM_146871, NM_146609, NM_146086, NM_146796, NM_001011531, NM_146523, NM_080450, NM_146895, NM_146526, NM_146525, NM_146524, NM_001011866, NM_001165944, NM_146529, NM_147006, NM_207254, NM_146903, NM_146944, NM_182714, AK044695, NM_146825, NM_146826, NM_146366, NM_146827, NM_001011859, NM_009915, NM_146829, NM_001011807, NM_146982, XM_001475614, NM_147075, NM_147034, NM_146729, NM_001011519, L08075, NM_146277, NM_001011811, NM_146776, NM_146975, AK143547, NM_053220, NM_146691, NM_001011740, NM_134177, NM_146508, NM_146747, XM_001481325, AK044345, NM_146689, NM_146926, Y15524, NM_007538, NM_146644, NM_207132, NM_146311, NM_028910 |
| GOTERM_BP_FAT | GO:0007600~sensory perception | 66 | 2,60E-06 |  | NM_146348, NM_146347, AK016832, NM_146843, NM_146807, NM_001142747, NM_147055, NM_001011831, NM_146698, NM_013624, NM_146871, NM_146609, NM_146086, NM_146796, NM_001011531, NM_146523, NM_080450, NM_146895, NM_146526, NM_146525, NM_146524, NM_001011866, NM_001165944, NM_146529, NM_147006, NM_207254, NM_146903, NM_146944, NM_182714, AK044695, NM_146825, NM_146826, NM_146366, NM_146827, NM_001011859, NM_009915, NM_146829, NM_001011807, NM_146982, XM_001475614, NM_147075, NM_147034, NM_146729, NM_001011519, L08075, NM_146277, NM_001011811, NM_146776, NM_146975, AK143547, NM_053220, NM_146691, NM_001011740, NM_134177, NM_146508, NM_146747, XM_001481325, AK044345, NM_146689, NM_146926, Y15524, NM_007538, NM_146644, NM_207132, NM_146311, NM_028910 |
| GOTERM_BP_FAT | GO:0050890~cognition          | 66 | 1,55E-05 |  | NM_146348, NM_146347, AK016832, NM_146843, NM_146807, NM_001142747, NM_147055, NM_001011831, NM_146698, NM_013624, NM_146871, NM_146609, NM_146086, NM_146796, NM_001011531, NM_146523, NM_080450, NM_146895, NM_146526, NM_146525, NM_146524, NM_001011866,                                                                                                                                                                                                                                                                                                                                                                                                                                                                                                                   |

|               |                                                    |    |          |  |                                                                                                                                                                                                                                                                                                                                                                                                                                                                                                                                                                                                                                                                                                                                                                                                                                                                                                                                                                                                                                                                                                                                                                                                                                                                                                                                                                                                                           |
|---------------|----------------------------------------------------|----|----------|--|---------------------------------------------------------------------------------------------------------------------------------------------------------------------------------------------------------------------------------------------------------------------------------------------------------------------------------------------------------------------------------------------------------------------------------------------------------------------------------------------------------------------------------------------------------------------------------------------------------------------------------------------------------------------------------------------------------------------------------------------------------------------------------------------------------------------------------------------------------------------------------------------------------------------------------------------------------------------------------------------------------------------------------------------------------------------------------------------------------------------------------------------------------------------------------------------------------------------------------------------------------------------------------------------------------------------------------------------------------------------------------------------------------------------------|
|               |                                                    |    |          |  | NM_001165944, NM_146529, NM_147006, NM_207254,<br>NM_146903, NM_146944, NM_182714, AK044695, NM_146825,<br>NM_146826, NM_146366, NM_146827, NM_001011859,<br>NM_009915, NM_146829, NM_001011807, NM_146982,<br>XM_001475614, NM_147075, NM_147034, NM_146729,<br>NM_001011519, L08075, NM_146277, NM_001011811, NM_146776,<br>NM_146975, AK143547, NM_053220, NM_146691, NM_001011740,<br>NM_134177, NM_146508, NM_146747, XM_001481325, AK044345,<br>NM_146689, NM_146926, Y15524, NM_007538, NM_146644,<br>NM_207132, NM_146311, NM_028910<br>NM_146348, NM_146347, NM_146843, NM_146807,<br>NM_001011831, NM_147055, NM_146698, NM_146609,<br>NM_146871, NM_146796, NM_001011531, NM_146523,<br>NM_146895, NM_146526, NM_146525, NM_146524,<br>NM_001011866, NM_001165944, NM_146529, NM_147006,<br>NM_207254, NM_146903, NM_146944, NM_182714, NM_146825,<br>NM_146826, NM_146827, NM_001011859, NM_146366,<br>NM_146829, NM_001011807, NM_146982, NM_147075,<br>XM_001475614, NM_147034, NM_146729, NM_001011519,<br>NM_146277, NM_001011811, NM_146776, NM_146975,<br>NM_146691, NM_001011740, NM_146508, NM_146747,<br>XM_001481325, NM_146689, NM_146926, Y15524, NM_146644,<br>NM_207132, NM_146311, NM_028910<br>NM_146348, NM_146347, NM_146843, NM_146807,<br>NM_001011831, NM_147055, NM_146698, NM_146609,<br>NM_146871, NM_146796, NM_001011531, NM_146523,<br>NM_146895, NM_146526, NM_146525, NM_146524, |
| GOTERM_BP_FAT | GO:0007608~sensory perception of smell             | 53 | 2,75E-05 |  |                                                                                                                                                                                                                                                                                                                                                                                                                                                                                                                                                                                                                                                                                                                                                                                                                                                                                                                                                                                                                                                                                                                                                                                                                                                                                                                                                                                                                           |
| GOTERM_BP_FAT | GO:0007606~sensory perception of chemical stimulus | 55 | 3,97E-05 |  |                                                                                                                                                                                                                                                                                                                                                                                                                                                                                                                                                                                                                                                                                                                                                                                                                                                                                                                                                                                                                                                                                                                                                                                                                                                                                                                                                                                                                           |

|               |                                                                |    |             |                                                                                                                                                                                                                                                                                                                                                                                                                                                                                                                                                                                                                                                                                                                                                                                                                                                                                                                                                                                                                                                                                                                                                                                                                                                                                                                                                                                                                                          |
|---------------|----------------------------------------------------------------|----|-------------|------------------------------------------------------------------------------------------------------------------------------------------------------------------------------------------------------------------------------------------------------------------------------------------------------------------------------------------------------------------------------------------------------------------------------------------------------------------------------------------------------------------------------------------------------------------------------------------------------------------------------------------------------------------------------------------------------------------------------------------------------------------------------------------------------------------------------------------------------------------------------------------------------------------------------------------------------------------------------------------------------------------------------------------------------------------------------------------------------------------------------------------------------------------------------------------------------------------------------------------------------------------------------------------------------------------------------------------------------------------------------------------------------------------------------------------|
|               |                                                                |    |             | NM_001011866, NM_001165944, NM_146529, NM_147006,<br>NM_207254, NM_146903, NM_146944, NM_182714, NM_146825,<br>NM_146826, NM_146827, NM_001011859, NM_146366,<br>NM_146829, NM_001011807, NM_146982, NM_147075,<br>XM_001475614, NM_147034, NM_146729, NM_001011519,<br>NM_146277, NM_001011811, NM_146776, NM_146975,<br>NM_053220, NM_146691, NM_001011740, NM_134177,<br>NM_146508, NM_146747, XM_001481325, NM_146689, NM_146926,<br>Y15524, NM_146644, NM_207132, NM_146311, NM_028910<br>NM_146348, NM_146347, AK149002, AK016832, NM_146843,<br>NM_146807, NM_001142747, NM_147055, NM_001011831,<br>NM_146698, NM_013624, NM_146871, NM_146609, NM_146086,<br>NM_146796, NM_001011531, NM_009891, NM_146523,<br>NM_080450, NM_146895, NM_146526, NM_146525, NM_146524,<br>NM_001011866, NM_001165944, NM_146529, NM_147006,<br>NM_207254, AK036325, NM_146903, NM_146944, NM_182714,<br>AK044695, NM_146825, NM_146826, NM_146366, NM_001011859,<br>NM_146827, NM_009915, NM_146829, NM_001011807,<br>NM_146982, XM_001475614, NM_147075, NM_147034, NM_146729,<br>NM_001011519, L08075, NM_146277, NM_001011811, NM_146776,<br>NM_146975, AK143547, NM_053220, NM_146691, NM_001011740,<br>NM_134177, NM_146508, NM_146747, XM_001481325, AK044345,<br>NM_011428, NM_146689, NM_146926, Y15524, NM_007538,<br>NM_146644, NM_207132, NM_146311, NM_028910<br>NM_030614, NM_008011, NM_031180, NM_010204, NM_022657,<br>NM_008006 |
| GOTERM_BP_FAT | GO:0050877~neurological system process                         | 70 | 7,15E-05    |                                                                                                                                                                                                                                                                                                                                                                                                                                                                                                                                                                                                                                                                                                                                                                                                                                                                                                                                                                                                                                                                                                                                                                                                                                                                                                                                                                                                                                          |
| GOTERM_BP_FAT | GO:0008543~fibroblast growth factor receptor signaling pathway | 6  | 9,72E-04    |                                                                                                                                                                                                                                                                                                                                                                                                                                                                                                                                                                                                                                                                                                                                                                                                                                                                                                                                                                                                                                                                                                                                                                                                                                                                                                                                                                                                                                          |
| GOTERM_BP_FAT | GO:0019236~response to                                         | 10 | 0,001559243 | NM_001166710, NM_134169, NM_134167, NM_134180,                                                                                                                                                                                                                                                                                                                                                                                                                                                                                                                                                                                                                                                                                                                                                                                                                                                                                                                                                                                                                                                                                                                                                                                                                                                                                                                                                                                           |

|               |                                                          |    |             |                                                                                                                                                                                                                                                                                                                                                                                                                                                                                                                                                                                                                                                                                                                                                                                                                                                                                                                                                                                                                                                                                                                                                                                                                                                                                                                                            |
|---------------|----------------------------------------------------------|----|-------------|--------------------------------------------------------------------------------------------------------------------------------------------------------------------------------------------------------------------------------------------------------------------------------------------------------------------------------------------------------------------------------------------------------------------------------------------------------------------------------------------------------------------------------------------------------------------------------------------------------------------------------------------------------------------------------------------------------------------------------------------------------------------------------------------------------------------------------------------------------------------------------------------------------------------------------------------------------------------------------------------------------------------------------------------------------------------------------------------------------------------------------------------------------------------------------------------------------------------------------------------------------------------------------------------------------------------------------------------|
|               | pheromone                                                |    |             | NM_134231, NM_053220, NM_134173, NM_001166719,<br>NM_134436, NM_134177, NM_134175                                                                                                                                                                                                                                                                                                                                                                                                                                                                                                                                                                                                                                                                                                                                                                                                                                                                                                                                                                                                                                                                                                                                                                                                                                                          |
| GOTERM_BP_FAT | GO:0008284~positive regulation of<br>cell proliferation  | 16 | 0,007837211 | NM_008501, AK037664, NM_031180, NM_010204, NM_007903,<br>NM_011562, NM_007950, NM_176996, NM_030614, NM_145136,<br>NM_008011, NM_008989, NM_198052, NM_009855, AK138305,<br>NM_008006<br>NM_177278, AK142139, NM_008103, NM_009541, NM_145707,<br>NM_194063, NM_001013765, BC034883, AK138305, NM_008006,<br>NM_008501, NM_008500, NM_025684, NM_001040089,<br>NM_010464, NM_008270, NM_199059, AK142268, NM_008273,<br>NM_008236, NM_001110316, NM_001033638, NM_145136,<br>NM_009803, NM_009880, NM_145710, NM_008989,<br>NM_001005425, NM_030226, XM_001480563, NM_010455,<br>AK021218, NM_030676, NM_001039698, NM_176996, NM_011041,<br>NM_198052, NM_007500, NM_008593, NM_022657, AK162583,<br>NM_010441, NM_001003666, NM_130869, NM_009719,<br>NM_001039198, NM_019732, NM_144955, NM_181319,<br>NM_008657, NM_011562, NM_001166584, NM_001024850,<br>NM_139226, NM_001039688<br>NM_177278, AK142139, NM_008103, NM_009541, NM_145707,<br>NM_194063, NM_001013765, BC034883, AK138305, NM_008006,<br>NM_008501, NM_008500, NM_025684, NM_001040089,<br>NM_010464, NM_008270, NM_199059, AK142268, NM_008273,<br>NM_008236, NM_001110316, NM_001033638, NM_145136,<br>NM_009803, NM_009880, NM_145710, NM_008989,<br>NM_001005425, NM_030226, XM_001480563, NM_010455,<br>AK021218, NM_030676, NM_001039698, NM_176996, NM_011041, |
| GOTERM_BP_FAT | GO:0006355~regulation of<br>transcription, DNA-dependent | 54 | 0,008413424 |                                                                                                                                                                                                                                                                                                                                                                                                                                                                                                                                                                                                                                                                                                                                                                                                                                                                                                                                                                                                                                                                                                                                                                                                                                                                                                                                            |
| GOTERM_BP_FAT | GO:0051252~regulation of RNA<br>metabolic process        | 54 | 0,011146055 |                                                                                                                                                                                                                                                                                                                                                                                                                                                                                                                                                                                                                                                                                                                                                                                                                                                                                                                                                                                                                                                                                                                                                                                                                                                                                                                                            |

|               |                                                                |    |             |                                                                                                                                                                                                                                                                                                                                                                                                                                                                                                                                                                                                                                                                                                                                                                                                                                                                                                                                                                                                                                                                                                                                                                                                                                                                                                                                                                |
|---------------|----------------------------------------------------------------|----|-------------|----------------------------------------------------------------------------------------------------------------------------------------------------------------------------------------------------------------------------------------------------------------------------------------------------------------------------------------------------------------------------------------------------------------------------------------------------------------------------------------------------------------------------------------------------------------------------------------------------------------------------------------------------------------------------------------------------------------------------------------------------------------------------------------------------------------------------------------------------------------------------------------------------------------------------------------------------------------------------------------------------------------------------------------------------------------------------------------------------------------------------------------------------------------------------------------------------------------------------------------------------------------------------------------------------------------------------------------------------------------|
|               |                                                                |    |             | NM_198052, NM_007500, NM_008593, NM_022657, AK162583,<br>NM_010441, NM_001003666, NM_130869, NM_009719,<br>NM_001039198, NM_019732, NM_144955, NM_181319,<br>NM_008657, NM_011562, NM_001166584, NM_001024850,<br>NM_139226, NM_001039688<br>NM_008501, NM_130869, NM_010455, NM_008270, NM_009719,<br>NM_030676, AK142268, AK142139, NM_009541, NM_011562,<br>NM_001166584, NM_176996, NM_145136, NM_009880,<br>NM_011041, NM_198052, NM_007500, NM_022657, AK138305,<br>NM_008006<br>NM_008501, NM_130869, NM_010455, NM_008270, NM_009719,<br>NM_030676, AK142268, AK142139, NM_009541, NM_011562,<br>NM_001166584, NM_176996, NM_145136, NM_009880,<br>NM_011041, NM_198052, NM_007500, NM_022657, AK138305,<br>NM_008006<br>NM_176996, NM_008011, NM_007500, NM_008273, NM_144955,<br>NM_008006<br>NM_011061, NM_177278, AK046648, NM_028572, AK149002,<br>NM_029416, AK142139, NM_008103, NM_009541, NM_145707,<br>NM_194063, NM_001013765, BC034883, NM_028679, AK138305,<br>NM_008006, NM_008501, NM_008500, NM_025684,<br>NM_001040089, NM_010464, NM_008270, AK142268, NM_199059,<br>NM_008273, NM_172495, NM_008236, NM_001110316,<br>NM_001033638, NM_016812, NM_145136, NM_145710,<br>NM_009880, NM_009803, NM_008989, NM_009804,<br>NM_001033281, NM_001005425, NM_027658, NM_030226,<br>AK037664, XM_001480563, NM_010455, AK021218, NM_030676, |
| GOTERM_BP_FAT | GO:0045893~positive regulation of transcription, DNA-dependent | 20 | 0,012737307 |                                                                                                                                                                                                                                                                                                                                                                                                                                                                                                                                                                                                                                                                                                                                                                                                                                                                                                                                                                                                                                                                                                                                                                                                                                                                                                                                                                |
| GOTERM_BP_FAT | GO:0051254~positive regulation of RNA metabolic process        | 20 | 0,013830448 |                                                                                                                                                                                                                                                                                                                                                                                                                                                                                                                                                                                                                                                                                                                                                                                                                                                                                                                                                                                                                                                                                                                                                                                                                                                                                                                                                                |
| GOTERM_BP_FAT | GO:0001708~cell fate specification                             | 6  | 0,018515382 |                                                                                                                                                                                                                                                                                                                                                                                                                                                                                                                                                                                                                                                                                                                                                                                                                                                                                                                                                                                                                                                                                                                                                                                                                                                                                                                                                                |
| GOTERM_BP_FAT | GO:0045449~regulation of transcription                         | 74 | 0,019713154 |                                                                                                                                                                                                                                                                                                                                                                                                                                                                                                                                                                                                                                                                                                                                                                                                                                                                                                                                                                                                                                                                                                                                                                                                                                                                                                                                                                |

|               |                                                                                                               |    |             |  |                                                                                                                                                                                                                                                                                                                                                                                                                                                                                                                                                                                                                                                                                                                                                                                                                                                                                                                                                                                                                                                                                                                                                                                                                                                                                                                                                          |
|---------------|---------------------------------------------------------------------------------------------------------------|----|-------------|--|----------------------------------------------------------------------------------------------------------------------------------------------------------------------------------------------------------------------------------------------------------------------------------------------------------------------------------------------------------------------------------------------------------------------------------------------------------------------------------------------------------------------------------------------------------------------------------------------------------------------------------------------------------------------------------------------------------------------------------------------------------------------------------------------------------------------------------------------------------------------------------------------------------------------------------------------------------------------------------------------------------------------------------------------------------------------------------------------------------------------------------------------------------------------------------------------------------------------------------------------------------------------------------------------------------------------------------------------------------|
|               |                                                                                                               |    |             |  | NM_183140, NM_007950, NM_176996, NM_001039698,<br>NM_011041, NM_198052, NM_007500, NM_008593, NM_022657,<br>NM_007893, NM_010441, AK162583, AK048565, NM_130869,<br>NM_001003666, NM_001039198, NM_009719, NM_019732,<br>AK033609, NM_144955, NM_181319, NM_008657, AK017287,<br>NM_172446, NM_011562, NM_001166584, NM_001024850,<br>NM_139226, NM_001039688, NM_011050<br>NM_008501, AK037664, NM_130869, NM_010455, NM_008270,<br>NM_009719, NM_030676, AK142268, AK142139, NM_008657,<br>NM_009541, NM_011562, NM_001166584, NM_007950,<br>NM_176996, NM_145136, NM_009880, NM_011041, NM_198052,<br>NM_007500, NM_022657, AK138305, NM_008006<br>NM_008501, NM_130869, NM_010455, NM_008270, NM_009719,<br>NM_030676, AK142268, AK142139, NM_008657, NM_009541,<br>NM_011562, NM_001166584, NM_176996, NM_145136,<br>NM_009880, NM_011041, NM_198052, NM_007500, NM_022657,<br>AK138305, NM_008006<br>NM_011562, NM_011652, NM_176996, NM_010455, NM_010464,<br>NM_009880, NM_008270, NM_198052, NM_008273, NM_144955,<br>AK138305, NM_008657<br>NM_008501, NM_130869, NM_010455, NM_008270, NM_009719,<br>NM_030676, AK142268, AK142139, NM_008657, NM_009541,<br>NM_011562, NM_001166584, NM_007950, NM_176996,<br>NM_145136, NM_009880, NM_011041, NM_198052, NM_007500,<br>NM_022657, AK138305, NM_008006<br>NM_007950, NM_198052, NM_001033281 |
| GOTERM_BP_FAT | GO:0010557~positive regulation of<br>macromolecule biosynthetic<br>process                                    | 23 | 0,021438055 |  |                                                                                                                                                                                                                                                                                                                                                                                                                                                                                                                                                                                                                                                                                                                                                                                                                                                                                                                                                                                                                                                                                                                                                                                                                                                                                                                                                          |
| GOTERM_BP_FAT | GO:0045941~positive regulation of<br>transcription                                                            | 21 | 0,024160439 |  |                                                                                                                                                                                                                                                                                                                                                                                                                                                                                                                                                                                                                                                                                                                                                                                                                                                                                                                                                                                                                                                                                                                                                                                                                                                                                                                                                          |
| GOTERM_BP_FAT | GO:0003002~regionalization                                                                                    | 12 | 0,024972855 |  |                                                                                                                                                                                                                                                                                                                                                                                                                                                                                                                                                                                                                                                                                                                                                                                                                                                                                                                                                                                                                                                                                                                                                                                                                                                                                                                                                          |
| GOTERM_BP_FAT | GO:0045935~positive regulation of<br>nucleobase, nucleoside, nucleotide<br>and nucleic acid metabolic process | 22 | 0,026339383 |  |                                                                                                                                                                                                                                                                                                                                                                                                                                                                                                                                                                                                                                                                                                                                                                                                                                                                                                                                                                                                                                                                                                                                                                                                                                                                                                                                                          |
| GOTERM_BP_FAT | GO:0051148~negative regulation of<br>muscle cell differentiation                                              | 3  | 0,026523869 |  |                                                                                                                                                                                                                                                                                                                                                                                                                                                                                                                                                                                                                                                                                                                                                                                                                                                                                                                                                                                                                                                                                                                                                                                                                                                                                                                                                          |



|               |                                                                       |    |             |                                                                                                                                                                                                                                                                                          |
|---------------|-----------------------------------------------------------------------|----|-------------|------------------------------------------------------------------------------------------------------------------------------------------------------------------------------------------------------------------------------------------------------------------------------------------|
| GOTERM_BP_FAT | GO:0007276~gamete generation                                          | 16 | 0,027395876 | NM_177866, NM_173023, NM_010418, NM_130869, NM_009220, NM_001160135, AK129256, NM_001145038, NM_001017409, NM_001160141, NM_013694, NM_001160142, NM_029416, NM_009693, NM_001025241, NM_007950, XM_001477675, NM_001085543, NM_019445, XM_001472176, XM_001474092, NM_013932, NM_183099 |
| GOTERM_BP_FAT | GO:0010628~positive regulation of gene expression                     | 21 | 0,030836506 | NM_008501, NM_130869, NM_010455, NM_008270, NM_009719, NM_030676, AK142268, AK142139, NM_008657, NM_009541, NM_011562, NM_001166584, NM_176996, NM_145136, NM_009880, NM_011041, NM_198052, NM_007500, NM_022657, AK138305, NM_008006                                                    |
| GOTERM_BP_FAT | GO:0031328~positive regulation of cellular biosynthetic process       | 23 | 0,031906241 | NM_008501, AK037664, NM_130869, NM_010455, NM_008270, NM_009719, NM_030676, AK142268, AK142139, NM_008657, NM_009541, NM_011562, NM_001166584, NM_007950, NM_176996, NM_145136, NM_009880, NM_011041, NM_198052, NM_007500, NM_022657, AK138305, NM_008006                               |
| GOTERM_BP_FAT | GO:0051147~regulation of muscle cell differentiation                  | 4  | 0,032299999 | NM_007950, NM_145136, NM_198052, NM_001033281                                                                                                                                                                                                                                            |
| GOTERM_BP_FAT | GO:0009891~positive regulation of biosynthetic process                | 23 | 0,034870049 | NM_008501, AK037664, NM_130869, NM_010455, NM_008270, NM_009719, NM_030676, AK142268, AK142139, NM_008657, NM_009541, NM_011562, NM_001166584, NM_007950, NM_176996, NM_145136, NM_009880, NM_011041, NM_198052, NM_007500, NM_022657, AK138305, NM_008006                               |
| GOTERM_BP_FAT | GO:0051173~positive regulation of nitrogen compound metabolic process | 22 | 0,03539263  | NM_008501, NM_130869, NM_010455, NM_008270, NM_009719, NM_030676, AK142268, AK142139, NM_008657, NM_009541, NM_011562, NM_001166584, NM_007950, NM_176996, NM_145136, NM_009880, NM_011041, NM_198052, NM_007500,                                                                        |

|               |                                                                                                                     |    |             |                                                                                                                                                                                                                                                                                                                                                                                                                                                                                                                                               |
|---------------|---------------------------------------------------------------------------------------------------------------------|----|-------------|-----------------------------------------------------------------------------------------------------------------------------------------------------------------------------------------------------------------------------------------------------------------------------------------------------------------------------------------------------------------------------------------------------------------------------------------------------------------------------------------------------------------------------------------------|
|               |                                                                                                                     |    |             | NM_022657, AK138305, NM_008006                                                                                                                                                                                                                                                                                                                                                                                                                                                                                                                |
| GOTERM_BP_FAT | GO:0006955~immune response                                                                                          | 20 | 0,040128114 | NM_001033978, NM_008501, NM_009915, AK075670, D38613, NM_001161842, NM_194336, NM_001169153, AF296427, NM_001143689, AF296435, NM_053093, NM_153761, NM_198297, NM_008204, NM_007719, NM_008176, AF487898, NM_008428, NM_145437, NM_201611 AK143547, NM_177866, NM_173023, NM_010418, NM_130869, NM_009220, NM_001160135, AK129256, NM_001145038, NM_001017409, NM_001160141, NM_013694, NM_001160142, NM_029416, NM_009693, NM_001025241, NM_007950, XM_001477675, NM_001085543, NM_019445, XM_001472176, XM_001474092, NM_013932, NM_183099 |
| GOTERM_BP_FAT | GO:0019953~sexual reproduction                                                                                      | 17 | 0,045873743 | NM_011562, NM_011652, NM_010455, NM_010464, NM_009880, NM_008270, NM_198052, NM_008273, NM_008657 NM_008501, NM_010455, NM_130869, NM_008270, NM_009719, NM_030676, AK142139, NM_011562, NM_001166584, NM_176996, NM_145136, NM_009880, NM_011041, NM_007500, AK138305, NM_008006                                                                                                                                                                                                                                                             |
| GOTERM_BP_FAT | GO:0009952~anterior/posterior pattern formation                                                                     | 9  | 0,046987789 | AK143547, NM_146086, AK044345, NM_007538, L08075, NM_001142747, AK044695                                                                                                                                                                                                                                                                                                                                                                                                                                                                      |
| GOTERM_BP_FAT | GO:0045944~positive regulation of transcription from RNA polymerase II promoter                                     | 16 | 0,048341705 |                                                                                                                                                                                                                                                                                                                                                                                                                                                                                                                                               |
| GOTERM_BP_FAT | GO:0007601~visual perception                                                                                        | 7  | 0,048354155 |                                                                                                                                                                                                                                                                                                                                                                                                                                                                                                                                               |
| 72 hs         |                                                                                                                     |    |             |                                                                                                                                                                                                                                                                                                                                                                                                                                                                                                                                               |
| GOTERM_BP_FAT | GO:0002821~positive regulation of adaptive immune response                                                          | 4  | 0,016907796 | NM_145857, NM_017371, NM_013632, NM_008324                                                                                                                                                                                                                                                                                                                                                                                                                                                                                                    |
| GOTERM_BP_FAT | GO:0002824~positive regulation of adaptive immune response based on somatic recombination of immune receptors built | 4  | 0,016907796 | NM_145857, NM_017371, NM_013632, NM_008324                                                                                                                                                                                                                                                                                                                                                                                                                                                                                                    |

|               |                                                 |    |             |                                                                                                                                                                  |
|---------------|-------------------------------------------------|----|-------------|------------------------------------------------------------------------------------------------------------------------------------------------------------------|
|               | from immunoglobulin superfamily domains         |    |             |                                                                                                                                                                  |
| GOTERM_BP_FAT | GO:0006665~sphingolipid metabolic process       | 5  | 0,017418438 | AK016156, NM_008635, AK082974, NM_018830, NM_011371                                                                                                              |
| GOTERM_BP_FAT | GO:0006643~membrane lipid metabolic process     | 5  | 0,019357366 | AK016156, NM_008635, AK082974, NM_018830, NM_011371                                                                                                              |
| GOTERM_BP_FAT | GO:0007269~neurotransmitter secretion           | 4  | 0,019709598 | AK036325, AK149250, BC005523, NM_153579                                                                                                                          |
| GOTERM_BP_FAT | GO:0016042~lipid catabolic process              | 7  | 0,020969081 | NM_009693, NM_008868, NM_023114, NM_053115, NM_012044, NM_011109, AK039149                                                                                       |
| GOTERM_BP_FAT | GO:0016053~organic acid biosynthetic process    | 7  | 0,026139018 | NM_001081664, NM_178767, NM_019455, AK049084, AK149431, NM_008324                                                                                                |
| GOTERM_BP_FAT | GO:0046394~carboxylic acid biosynthetic process | 7  | 0,026139018 | NM_001081664, NM_178767, NM_019455, AK049084, AK149431, NM_008324                                                                                                |
| GOTERM_BP_FAT | GO:0032989~cellular component morphogenesis     | 12 | 0,026368172 | NM_011652, AK082711, NM_010451, NM_008635, NM_001142732, AK149002, AF153046, NM_007936, NM_007601, NM_007868, NM_016791, NM_001113481, NM_001130409              |
| GOTERM_BP_FAT | GO:0045926~negative regulation of growth        | 5  | 0,027166769 | NM_145857, NM_007706, AK033206, AK138305, NM_001113481, NM_001130409                                                                                             |
| GOTERM_BP_FAT | GO:0044272~sulfur compound biosynthetic process | 4  | 0,027766557 | AK049084, AK149431, AK166962                                                                                                                                     |
| GOTERM_BP_FAT | GO:0001816~cytokine production                  | 4  | 0,031409388 | NM_145857, NM_001033367, NM_029926, NM_008324                                                                                                                    |
| GOTERM_BP_FAT | GO:0043062~extracellular structure organization | 7  | 0,033011627 | NM_022315, AK149250, NM_011682, AK041037, BC005523, NM_007583, NM_001130409                                                                                      |
| GOTERM_BP_FAT | GO:0055085~transmembrane transport              | 14 | 0,034646665 | NM_177866, NM_177809, NM_001039104, NM_011075, AK044260, NM_153579, NM_026200, NM_152923, NM_001006676, NM_011887, NM_198304, NM_153512, NM_001033336, NM_145551 |
| GOTERM_BP_FAT | GO:0006687~glycosphingolipid metabolic process  | 3  | 0,036625572 | AK016156, NM_008635, NM_011371                                                                                                                                   |
| GOTERM_BP_FAT | GO:0046700~heterocycle catabolic process        | 4  | 0,037319002 | NM_001164289, NM_013632, AF038896, NM_008324                                                                                                                     |

|                                   |                                                                   |    |             |                                                                                                                                                                                                                                                                                                                                                                                                                                                                                                                                                                                                                                                                                                                                            |
|-----------------------------------|-------------------------------------------------------------------|----|-------------|--------------------------------------------------------------------------------------------------------------------------------------------------------------------------------------------------------------------------------------------------------------------------------------------------------------------------------------------------------------------------------------------------------------------------------------------------------------------------------------------------------------------------------------------------------------------------------------------------------------------------------------------------------------------------------------------------------------------------------------------|
| GOTERM_BP_FAT                     | GO:0007389~pattern specification process                          | 10 | 0,039825349 | NM_011562, NM_011652, NM_010451, NM_010928, NM_011265, NM_010303, NM_175542, AF153046, AK084505, AK138305                                                                                                                                                                                                                                                                                                                                                                                                                                                                                                                                                                                                                                  |
| GOTERM_BP_FAT                     | GO:0050808~synapse organization                                   | 4  | 0,043755313 | AK149250, NM_011682, BC005523, NM_007583                                                                                                                                                                                                                                                                                                                                                                                                                                                                                                                                                                                                                                                                                                   |
| GOTERM_BP_FAT                     | GO:0048858~cell projection morphogenesis                          | 8  | 0,044330253 | AK082711, NM_010451, NM_001142732, AK149002, AF153046, NM_007936, NM_007868, NM_001113481, NM_001130409                                                                                                                                                                                                                                                                                                                                                                                                                                                                                                                                                                                                                                    |
| GOTERM_BP_FAT                     | GO:0003001~generation of a signal involved in cell-cell signaling | 5  | 0,046043342 | AK036325, AK149250, NM_016977, BC005523, NM_153579                                                                                                                                                                                                                                                                                                                                                                                                                                                                                                                                                                                                                                                                                         |
| GOTERM_BP_FAT                     | GO:0032735~positive regulation of interleukin-12 production       | 2  | 0,047366075 | NM_145857, NM_008324                                                                                                                                                                                                                                                                                                                                                                                                                                                                                                                                                                                                                                                                                                                       |
| GOTERM_BP_FAT                     | GO:0006664~glycolipid metabolic process                           | 3  | 0,047956379 | AK016156, NM_008635, NM_011371                                                                                                                                                                                                                                                                                                                                                                                                                                                                                                                                                                                                                                                                                                             |
| Up-regulated biological processes |                                                                   |    |             |                                                                                                                                                                                                                                                                                                                                                                                                                                                                                                                                                                                                                                                                                                                                            |
| 6 hs                              |                                                                   |    |             |                                                                                                                                                                                                                                                                                                                                                                                                                                                                                                                                                                                                                                                                                                                                            |
| GOTERM_BP_FAT                     | GO:0007186~G-protein coupled receptor protein signaling pathway   | 77 | 1,24E-08    | NM_021340, NM_146348, NM_134180, NM_146700, NM_146347, NM_146849, NM_146345, NM_147055, NM_001011831, NM_001011736, NM_020488, NM_146698, NM_146861, NM_029525, NM_147049, NM_001010830, NM_001011535, NM_007719, NM_146796, NM_001011531, NM_001104573, NM_153067, NM_146523, NM_146895, NM_147061, NM_009314, NM_001166719, NM_001165944, NM_146670, NM_147006, NM_010323, NM_207254, NM_010974, NM_146903, NM_001105065, NM_001105067, NM_001104562, NM_146825, NM_146827, NM_203490, NM_207546, NM_009915, NM_146829, XM_001475614, NM_147075, NM_207224, NM_147034, NM_020510, NM_001166727, NM_203492, NM_146681, NM_176996, NM_146890, NM_146323, NM_134213, NM_001011811, NM_146776, AK143547, NM_146714, NM_134231, NM_001105152, |

|               |                                                                |    |          |                                                                                                                                                                                                                                                                                                                                                                                                                                                                                                                                                                                                                                                                                                                                                                                                                                                                                                                                                                                                                                                                                                                                                                                                                                                                                                                                                                                                                                                                                                                        |
|---------------|----------------------------------------------------------------|----|----------|------------------------------------------------------------------------------------------------------------------------------------------------------------------------------------------------------------------------------------------------------------------------------------------------------------------------------------------------------------------------------------------------------------------------------------------------------------------------------------------------------------------------------------------------------------------------------------------------------------------------------------------------------------------------------------------------------------------------------------------------------------------------------------------------------------------------------------------------------------------------------------------------------------------------------------------------------------------------------------------------------------------------------------------------------------------------------------------------------------------------------------------------------------------------------------------------------------------------------------------------------------------------------------------------------------------------------------------------------------------------------------------------------------------------------------------------------------------------------------------------------------------------|
| GOTERM_BP_FAT | GO:0007166~cell surface receptor linked<br>signal transduction | 89 | 4,02E-07 | <p>NM_001105156, NM_134173, NM_146691, NM_146873,<br/> NM_001011740, NM_134177, NM_146508, NM_134175,<br/> NM_001104543, NM_146591, NM_001105180, NM_134169,<br/> XM_001481325, NM_001104540, NM_206868, NM_001039652,<br/> NM_146689, Y15524, NM_206823, NM_146647, NM_146749,<br/> NM_028910<br/> NM_021340, NM_146348, NM_134180, NM_146700, NM_146347,<br/> NM_146849, NM_146345, AK046903, NM_147055, NM_001011831,<br/> NM_001011736, NM_020488, NM_146698, NM_146861,<br/> NM_029525, NM_147049, NM_001010830, NM_145745,<br/> NM_145467, NM_001082960, NM_001011535, NM_007719,<br/> NM_146796, NM_001011531, NM_001104573, AK138305,<br/> NM_153067, NM_146523, NM_146895, NM_147061, NM_009314,<br/> NM_001166719, NM_001165944, NM_146670, NM_147006,<br/> NM_010323, NM_207254, NM_010974, NM_146903, NM_030614,<br/> NM_001105065, NM_001105067, NM_001104562, NM_146825,<br/> NM_146827, NM_203490, NM_207546, NM_009915, NM_146829,<br/> XM_001475614, NM_147075, NM_207224, NM_147034, NM_020510,<br/> NM_001166727, NM_203492, NM_146681, NM_176996,<br/> NM_146890, NM_146323, NM_022657, NM_134213,<br/> NM_001011811, NM_001043317, NM_146776, AK143547,<br/> NM_146714, NM_134231, NM_001105152, NM_027665,<br/> NM_001105156, NM_134173, NM_146691, NM_146873,<br/> NM_001011740, NM_134177, NM_146508, NM_144955,<br/> NM_134175, NM_001104543, NM_146591, NM_001105180,<br/> NM_134169, XM_001481325, NM_001104540, NM_206868,<br/> NM_001039652, NM_146689, NM_008011, Y15524, NM_206823,</p> |
|---------------|----------------------------------------------------------------|----|----------|------------------------------------------------------------------------------------------------------------------------------------------------------------------------------------------------------------------------------------------------------------------------------------------------------------------------------------------------------------------------------------------------------------------------------------------------------------------------------------------------------------------------------------------------------------------------------------------------------------------------------------------------------------------------------------------------------------------------------------------------------------------------------------------------------------------------------------------------------------------------------------------------------------------------------------------------------------------------------------------------------------------------------------------------------------------------------------------------------------------------------------------------------------------------------------------------------------------------------------------------------------------------------------------------------------------------------------------------------------------------------------------------------------------------------------------------------------------------------------------------------------------------|

|               |                               |    |          |                                                                                                                                                                                                                                                                                                                                                                                                                                                                                                                                                                                                                                                                                                                                                                                                                                                                                                                                                                                                                                                                                                                                                                  |
|---------------|-------------------------------|----|----------|------------------------------------------------------------------------------------------------------------------------------------------------------------------------------------------------------------------------------------------------------------------------------------------------------------------------------------------------------------------------------------------------------------------------------------------------------------------------------------------------------------------------------------------------------------------------------------------------------------------------------------------------------------------------------------------------------------------------------------------------------------------------------------------------------------------------------------------------------------------------------------------------------------------------------------------------------------------------------------------------------------------------------------------------------------------------------------------------------------------------------------------------------------------|
|               |                               |    |          | NM_001033228, NM_146647, NM_146749, NM_028910                                                                                                                                                                                                                                                                                                                                                                                                                                                                                                                                                                                                                                                                                                                                                                                                                                                                                                                                                                                                                                                                                                                    |
| GOTERM_BP_FAT | GO:0007600~sensory perception | 56 | 5,64E-06 | NM_021340, NM_146348, NM_146700, NM_146347, NM_146849,<br>NM_146345, AK016832, NM_001011831, NM_001011736,<br>NM_147055, NM_146698, NM_146861, NM_147049, NM_146086,<br>NM_146796, NM_001011531, NM_146523, NM_080450,<br>NM_146895, NM_147061, NM_001165944, NM_146670,<br>NM_147006, NM_207254, NM_010974, NM_172621, NM_146903,<br>AK044695, NM_146825, NM_146827, NM_146829, NM_009915,<br>NM_147075, XM_001475614, NM_207224, NM_147034, NM_146681,<br>NM_146890, NM_146323, L08075, NM_001038845, NM_001011811,<br>NM_146776, AK143547, NM_146691, NM_001011740, NM_134177,<br>NM_146508, NM_146591, NM_053077, XM_001481325, NM_146689,<br>Y15524, NM_206823, NM_146647, NM_146749, NM_028910<br>NM_021340, NM_146348, NM_146700, NM_146347, NM_146849,<br>NM_146345, AK016832, NM_001011831, NM_001011736,<br>NM_147055, NM_146698, NM_146861, NM_147049, NM_146086,<br>NM_146796, NM_001011531, NM_146523, NM_080450,<br>NM_146895, NM_147061, NM_001165944, NM_146670,<br>NM_147006, NM_207254, NM_010974, NM_172621, NM_146903,<br>AK044695, NM_146825, NM_146827, NM_146829, NM_009915,<br>NM_147075, XM_001475614, NM_207224, NM_147034, NM_146681, |
| GOTERM_BP_FAT | GO:0050890~cognition          | 56 | 2,70E-05 | NM_021340, NM_146348, NM_146700, NM_146347, NM_146849,<br>NM_146345, AK016832, NM_001011831, NM_001011736,<br>NM_147055, NM_146698, NM_146861, NM_147049, NM_146086,<br>NM_146796, NM_001011531, NM_146523, NM_080450,<br>NM_146895, NM_147061, NM_001165944, NM_146670,<br>NM_147006, NM_207254, NM_010974, NM_172621, NM_146903,<br>AK044695, NM_146825, NM_146827, NM_146829, NM_009915,<br>NM_147075, XM_001475614, NM_207224, NM_147034, NM_146681,                                                                                                                                                                                                                                                                                                                                                                                                                                                                                                                                                                                                                                                                                                         |

---

|               |                                        |    |          |                                                                                                                                                                                                                                                                                                                                                                                                                                                                                                                                                                                                                                                               |
|---------------|----------------------------------------|----|----------|---------------------------------------------------------------------------------------------------------------------------------------------------------------------------------------------------------------------------------------------------------------------------------------------------------------------------------------------------------------------------------------------------------------------------------------------------------------------------------------------------------------------------------------------------------------------------------------------------------------------------------------------------------------|
|               |                                        |    |          | NM_146890, NM_146323, L08075, NM_001038845, NM_001011811,<br>NM_146776, AK143547, NM_146691, NM_001011740, NM_134177,<br>NM_146508, NM_146591, NM_053077, XM_001481325, NM_146689,<br>Y15524, NM_206823, NM_146647, NM_146749, NM_028910<br>NM_021340, NM_146348, NM_146700, NM_146347, NM_146849,<br>AK149002, NM_146345, AK016832, NM_001011831,<br>NM_001011736, NM_147055, NM_146698, NM_146861,<br>NM_147049, NM_146086, NM_146796, NM_001011531,<br>NM_009891, NM_146523, NM_080450, NM_146895, NM_147061,<br>NM_001165944, NM_146670, NM_147006, NM_207254,                                                                                            |
| GOTERM_BP_FAT | GO:0050877~neurological system process | 60 | 6,87E-05 | NM_010974, NM_172621, AK036325, NM_146903, AK044695,<br>NM_146825, NM_146827, NM_146829, NM_009915, NM_147075,<br>XM_001475614, NM_207224, NM_147034, NM_146681, NM_146890,<br>NM_146323, L08075, NM_001038845, NM_001011811, NM_146776,<br>AK143547, NM_146691, NM_001011740, NM_134177, NM_146508,<br>NM_146591, NM_053077, XM_001481325, NM_146689, NM_011428,<br>Y15524, NM_206823, NM_146647, NM_146749, NM_028910<br>NM_146825, NM_146827, NM_146348, NM_146829, NM_146700,<br>NM_146347, NM_146849, NM_146345, NM_147075, XM_001475614,<br>NM_207224, NM_147034, NM_001011831, NM_001011736,<br>NM_147055, NM_146698, NM_146681, NM_146861, NM_147049, |
| GOTERM_BP_FAT | GO:0007608~sensory perception of smell | 44 | 1,07E-04 | NM_146890, NM_146323, NM_146796, NM_001011531,<br>NM_001011811, NM_146776, NM_146523, NM_146895,<br>NM_147061, NM_146691, NM_001165944, NM_146670,<br>NM_147006, NM_001011740, NM_207254, NM_146508,<br>NM_146591, NM_010974, XM_001481325, NM_146903, NM_146689,<br>Y15524, NM_206823, NM_146647, NM_146749, NM_028910                                                                                                                                                                                                                                                                                                                                       |

---

|               |                                                    |    |             |                                                                                                                                                                                                                                                                                                                                                                                                                                                                                                                                               |
|---------------|----------------------------------------------------|----|-------------|-----------------------------------------------------------------------------------------------------------------------------------------------------------------------------------------------------------------------------------------------------------------------------------------------------------------------------------------------------------------------------------------------------------------------------------------------------------------------------------------------------------------------------------------------|
| GOTERM_BP_FAT | GO:0007606~sensory perception of chemical stimulus | 45 | 2,27E-04    | NM_146825, NM_146827, NM_146348, NM_146829, NM_146700, NM_146347, NM_146849, NM_146345, NM_147075, XM_001475614, NM_207224, NM_147034, NM_001011831, NM_001011736, NM_147055, NM_146698, NM_146681, NM_146861, NM_147049, NM_146890, NM_146323, NM_146796, NM_001011531, NM_001011811, NM_146776, NM_146523, NM_146895, NM_147061, NM_146691, NM_001165944, NM_146670, NM_134177, NM_147006, NM_001011740, NM_207254, NM_146508, NM_146591, NM_010974, XM_001481325, NM_146903, NM_146689, Y15524, NM_206823, NM_146647, NM_146749, NM_028910 |
| GOTERM_BP_FAT | GO:0019236~response to pheromone                   | 8  | 0,006849656 | NM_134169, NM_134180, NM_134231, NM_134173, NM_001166719, NM_134177, NM_134213, NM_134175                                                                                                                                                                                                                                                                                                                                                                                                                                                     |
| GOTERM_BP_FAT | GO:0003002~regionalization                         | 11 | 0,016688383 | NM_011562, NM_010452, NM_176996, NM_010455, NM_010464, NM_009880, NM_008270, NM_175730, NM_008273, NM_144955, AK138305                                                                                                                                                                                                                                                                                                                                                                                                                        |
| GOTERM_BP_FAT | GO:0001708~cell fate specification                 | 5  | 0,037008316 | NM_010861, NM_176996, NM_008011, NM_008273, NM_144955                                                                                                                                                                                                                                                                                                                                                                                                                                                                                         |
| GOTERM_BP_FAT | GO:0030500~regulation of bone mineralization       | 3  | 0,044735864 | NM_001038845, NM_022657, NM_031368                                                                                                                                                                                                                                                                                                                                                                                                                                                                                                            |
| GOTERM_BP_FAT | GO:0070167~regulation of biomineral formation      | 3  | 0,044735864 | NM_001038845, NM_022657, NM_031368                                                                                                                                                                                                                                                                                                                                                                                                                                                                                                            |
| GOTERM_BP_FAT | GO:0006955~immune response                         | 17 | 0,045568646 | NM_001033978, NM_021319, NM_001170333, NM_001081032, NM_009915, AK075670, NM_016850, D38613, NM_001169153, NM_194336, AF296427, NM_177635, NM_198297, NM_008204, NM_007719, AF487898, NM_009946, NM_145437                                                                                                                                                                                                                                                                                                                                    |
| GOTERM_BP_FAT | GO:0009952~anterior/posterior pattern formation    | 8  | 0,045839525 | NM_011562, NM_010452, NM_010455, NM_010464, NM_009880, NM_008270, NM_175730, NM_008273                                                                                                                                                                                                                                                                                                                                                                                                                                                        |



|               |                                                                        |    |             |                                                                                                                                   |
|---------------|------------------------------------------------------------------------|----|-------------|-----------------------------------------------------------------------------------------------------------------------------------|
| GOTERM_BP_FAT | GO:0007267~cell-cell signaling                                         | 12 | 0,04712737  | AK036325, AK143547, NM_080450, NM_176996, AK149002, NM_011428, NM_008011, NM_001038845, NM_009891, NM_020510, NM_008273, AK138305 |
| 24 hs         |                                                                        |    |             |                                                                                                                                   |
| GOTERM_BP_FAT | GO:0030239~myofibril assembly                                          | 3  | 0,01161087  | NM_009608, NM_001164171, NM_011619                                                                                                |
| GOTERM_BP_FAT | GO:0031032~actomyosin structure organization                           | 3  | 0,019692913 | NM_009608, NM_001164171, NM_011619                                                                                                |
| GOTERM_BP_FAT | GO:0006955~immune response                                             | 10 | 0,021452078 | NM_009888, NM_011095, NM_133893, NM_001040691, NM_175397, NM_133200, NM_016850, NM_133211, NM_013478, NM_023476                   |
| GOTERM_BP_FAT | GO:0007283~spermatogenesis                                             | 7  | 0,02376532  | NM_030080, NM_207680, NM_170671, NM_175643, NM_009292, NM_173029, BC090648                                                        |
| GOTERM_BP_FAT | GO:0048232~male gamete generation                                      | 7  | 0,02376532  | NM_030080, NM_207680, NM_170671, NM_175643, NM_009292, NM_173029, BC090648                                                        |
| GOTERM_BP_FAT | GO:0002252~immune effector process                                     | 5  | 0,024070227 | NM_009888, NM_011095, NM_001040691, NM_016850, NM_133211                                                                          |
| GOTERM_BP_FAT | GO:0007276~gamete generation                                           | 8  | 0,025304878 | NM_133893, NM_030080, NM_207680, NM_170671, NM_175643, NM_009292, NM_173029, BC090648                                             |
| GOTERM_BP_FAT | GO:0032504~multicellular organism reproduction                         | 9  | 0,026096597 | NM_133893, NM_030080, NM_207680, NM_170671, NM_011680, NM_175643, NM_009292, NM_173029, BC090648                                  |
| GOTERM_BP_FAT | GO:0048609~reproductive process in a multicellular organism            | 9  | 0,026096597 | NM_133893, NM_030080, NM_207680, NM_170671, NM_011680, NM_175643, NM_009292, NM_173029, BC090648                                  |
| GOTERM_BP_FAT | GO:0007066~female meiosis sister chromatid cohesion                    | 2  | 0,034290397 | NM_009292, BC090648                                                                                                               |
| GOTERM_BP_FAT | GO:0010927~cellular component assembly involved in morphogenesis       | 3  | 0,038884361 | NM_009608, NM_001164171, NM_011619                                                                                                |
| GOTERM_BP_FAT | GO:0006357~regulation of transcription from RNA polymerase II promoter | 11 | 0,04169182  | NM_030080, NM_010800, NM_029469, BC026991, NM_001012518, NM_017395, NM_001168502, NM_011680, AK081813, NM_011912,                 |

|               |                                                          |    |             |                                                                                                                 |
|---------------|----------------------------------------------------------|----|-------------|-----------------------------------------------------------------------------------------------------------------|
|               |                                                          |    |             | NM_139227                                                                                                       |
| GOTERM_BP_FAT | GO:0051177~meiotic sister chromatid cohesion             | 2  | 0,042679218 | NM_009292, BC090648                                                                                             |
| 72 hs         |                                                          |    |             |                                                                                                                 |
| GOTERM_BP_FAT | GO:0030324~lung development                              | 7  | 0,00232002  | NM_008259, NM_212452, NM_008970, NM_010728, NM_205769, NM_008002, NM_001159487                                  |
| GOTERM_BP_FAT | GO:0030323~respiratory tube development                  | 7  | 0,002538044 | NM_008259, NM_212452, NM_008970, NM_010728, NM_205769, NM_008002, NM_001159487                                  |
| GOTERM_BP_FAT | GO:0048732~gland development                             | 9  | 0,002799628 | NM_010828, NM_008259, NM_212452, NM_008970, NM_009370, NM_010456, NM_205769, NM_008002, NM_008700               |
| GOTERM_BP_FAT | GO:0060541~respiratory system development                | 7  | 0,004023507 | NM_008259, NM_212452, NM_008970, NM_010728, NM_205769, NM_008002, NM_001159487                                  |
| GOTERM_BP_FAT | GO:0035295~tube development                              | 10 | 0,004964891 | NM_007540, NM_008259, NM_212452, NM_008970, NM_010728, NM_015743, NM_205769, NM_008002, NM_001159487, NM_008700 |
| GOTERM_BP_FAT | GO:0048610~reproductive cellular process                 | 8  | 0,005188178 | NM_008259, NM_025727, NM_013598, NM_021879, NM_009370, NM_001122733, NM_001159487, NM_198418                    |
| GOTERM_BP_FAT | GO:0008354~germ cell migration                           | 3  | 0,007501416 | NM_013598, NM_009370, NM_001122733                                                                              |
| GOTERM_BP_FAT | GO:0048070~regulation of pigmentation during development | 3  | 0,007501416 | NM_007903, NM_013598, NM_001122733                                                                              |
| GOTERM_BP_FAT | GO:0007281~germ cell development                         | 6  | 0,007720224 | NM_025727, NM_013598, NM_021879, NM_001122733, NM_001159487, NM_198418                                          |
| GOTERM_BP_FAT | GO:0043062~extracellular structure organization          | 7  | 0,009665215 | NM_212452, NM_010728, NM_009370, NM_016907, NM_001081023, NM_008940, NM_007424                                  |
| GOTERM_BP_FAT | GO:0043069~negative regulation of programmed cell death  | 9  | 0,009906034 | NM_007540, NM_010828, NM_013598, NM_009129, NM_009370, NM_001122733, NM_007429, NM_007702, NM_008700            |
| GOTERM_BP_FAT | GO:0033555~multicellular organismal response to stress   | 4  | 0,010095664 | NM_007540, NM_009311, NM_001002927, NM_008102                                                                   |

|               |                                                             |    |             |                                                                                                                                                                |
|---------------|-------------------------------------------------------------|----|-------------|----------------------------------------------------------------------------------------------------------------------------------------------------------------|
| GOTERM_BP_FAT | GO:0060548~negative regulation of cell death                | 9  | 0,010138906 | NM_007540, NM_010828, NM_013598, NM_009129, NM_009370, NM_001122733, NM_007429, NM_007702, NM_008700                                                           |
| GOTERM_BP_FAT | GO:0032504~multicellular organism reproduction              | 12 | 0,011291423 | NM_010828, NM_025727, NM_013598, NM_001039385, NM_008970, NM_021879, NM_009370, NM_001122733, NM_009061, NM_001159487, NM_013498, NM_198418                    |
| GOTERM_BP_FAT | GO:0048609~reproductive process in a multicellular organism | 12 | 0,011291423 | NM_010828, NM_025727, NM_013598, NM_001039385, NM_008970, NM_021879, NM_009370, NM_001122733, NM_009061, NM_001159487, NM_013498, NM_198418                    |
| GOTERM_BP_FAT | GO:0042127~regulation of cell proliferation                 | 14 | 0,014103056 | NM_007540, NM_013598, NM_009129, NM_008970, NR_001592, NM_001122733, NM_001159487, NM_008700, NM_007903, NM_008037, NM_008002, NM_021451, NM_008021, NM_011340 |
| GOTERM_BP_FAT | GO:0007218~neuropeptide signaling pathway                   | 5  | 0,014918406 | NM_009311, NM_001002927, NM_013732, NM_010932, NM_009625                                                                                                       |
| GOTERM_BP_FAT | GO:0003006~reproductive developmental process               | 9  | 0,015346789 | NM_010828, NM_008259, NM_025727, NM_013598, NM_001039385, NM_021879, NM_001122733, NM_001159487, NM_198418                                                     |
| GOTERM_BP_FAT | GO:0009968~negative regulation of signal transduction       | 7  | 0,018066661 | NM_153171, NM_011915, NM_020265, NM_009061, NM_009062, NM_028679, NM_007702                                                                                    |
| GOTERM_BP_FAT | GO:0043067~regulation of programmed cell death              | 14 | 0,019013797 | NM_007540, NM_001111030, NM_013598, NM_009129, NM_001122733, NM_009370, NM_007429, NM_008700, NM_010828, NM_008102, NM_021451, NM_007702, NM_028679, NM_138313 |
| GOTERM_BP_FAT | GO:0043405~regulation of MAP kinase activity                | 5  | 0,019090065 | NM_013598, NM_027106, NM_001122733, NM_175093, NM_028679                                                                                                       |
| GOTERM_BP_FAT | GO:0010941~regulation of cell death                         | 14 | 0,019772735 | NM_007540, NM_001111030, NM_013598, NM_009129, NM_001122733, NM_009370, NM_007429, NM_008700, NM_010828, NM_008102, NM_021451, NM_007702, NM_028679,           |

|               |                                                                        |    |             |                                                                                                              |
|---------------|------------------------------------------------------------------------|----|-------------|--------------------------------------------------------------------------------------------------------------|
|               |                                                                        |    |             | NM_138313                                                                                                    |
| GOTERM_BP_FAT | GO:0010817~regulation of hormone levels                                | 6  | 0,019906047 | NM_008259, NM_001039385, NM_013628, NM_205769, NM_001159487, NM_198408                                       |
| GOTERM_BP_FAT | GO:0035150~regulation of tube size                                     | 4  | 0,020403199 | NM_007903, NM_007429, NM_008102, NM_010933                                                                   |
| GOTERM_BP_FAT | GO:0050880~regulation of blood vessel size                             | 4  | 0,020403199 | NM_007903, NM_007429, NM_008102, NM_010933                                                                   |
| GOTERM_BP_FAT | GO:0008284~positive regulation of cell proliferation                   | 9  | 0,022688649 | NM_007903, NM_013598, NM_009129, NM_008970, NM_001122733, NM_008037, NM_008021, NM_008002, NM_008700         |
| GOTERM_BP_FAT | GO:0003018~vascular process in circulatory system                      | 4  | 0,022720082 | NM_007903, NM_007429, NM_008102, NM_010933                                                                   |
| GOTERM_BP_FAT | GO:0044087~regulation of cellular component biogenesis                 | 5  | 0,023067282 | NM_207267, NM_009370, NM_009635, AK020250, NM_008700                                                         |
| GOTERM_BP_FAT | GO:0042445~hormone metabolic process                                   | 5  | 0,023918651 | NM_008259, NM_013628, NM_205769, NM_001159487, NM_198408                                                     |
| GOTERM_BP_FAT | GO:0060658~nipple morphogenesis                                        | 2  | 0,024139564 | NM_212452, NM_008970                                                                                         |
| GOTERM_BP_FAT | GO:0060618~nipple development                                          | 2  | 0,024139564 | NM_212452, NM_008970                                                                                         |
| GOTERM_BP_FAT | GO:0010648~negative regulation of cell communication                   | 7  | 0,025995955 | NM_153171, NM_011915, NM_020265, NM_009061, NM_009062, NM_028679, NM_007702                                  |
| GOTERM_BP_FAT | GO:0030199~collagen fibril organization                                | 3  | 0,026459378 | NM_010728, NM_009370, NM_007424                                                                              |
| GOTERM_BP_FAT | GO:0043066~negative regulation of apoptosis                            | 8  | 0,026740307 | NM_007540, NM_010828, NM_013598, NM_009129, NM_009370, NM_007429, NM_007702, NM_008700                       |
| GOTERM_BP_FAT | GO:0048568~embryonic organ development                                 | 8  | 0,027928578 | NM_010828, NM_015743, NM_009370, NM_009323, NM_026571, NM_016907, NM_008002, NM_001159487                    |
| GOTERM_BP_FAT | GO:0001568~blood vessel development                                    | 8  | 0,029465558 | NM_010828, NM_009129, NM_010728, NM_009370, NM_016907, NM_008021, NM_008002, NM_008700                       |
| GOTERM_BP_FAT | GO:0045944~positive regulation of transcription from RNA polymerase II | 10 | 0,03073695  | NM_010828, NM_008259, NM_153553, NM_015743, NM_153786, NM_007922, NM_009719, NM_008021, NM_008700, NM_010234 |

|               |                                                                          |    |             |                                                                                                                                                             |
|---------------|--------------------------------------------------------------------------|----|-------------|-------------------------------------------------------------------------------------------------------------------------------------------------------------|
|               | promoter                                                                 |    |             |                                                                                                                                                             |
| GOTERM_BP_FAT | GO:0001944~vasculature development                                       | 8  | 0,032991888 | NM_010828, NM_009129, NM_010728, NM_009370, NM_016907, NM_008021, NM_008002, NM_008700                                                                      |
| GOTERM_BP_FAT | GO:0044093~positive regulation of molecular function                     | 9  | 0,033307463 | NM_013598, NM_008970, NM_027106, NM_001122733, NM_013732, NM_007429, NM_009625, NM_028679, NM_008700                                                        |
| GOTERM_BP_FAT | GO:0051241~negative regulation of multicellular organismal process       | 5  | 0,033480694 | NM_013732, NM_007429, NM_001159487, NM_028679, NM_008940                                                                                                    |
| GOTERM_BP_FAT | GO:0030198~extracellular matrix organization                             | 5  | 0,034542982 | NM_212452, NM_010728, NM_009370, NM_016907, NM_007424                                                                                                       |
| GOTERM_BP_FAT | GO:0060648~mammary gland bud morphogenesis                               | 2  | 0,035991247 | NM_008970, NM_008002                                                                                                                                        |
| GOTERM_BP_FAT | GO:0042981~regulation of apoptosis                                       | 13 | 0,037220035 | NM_007540, NM_001111030, NM_013598, NM_009129, NM_009370, NM_007429, NM_008700, NM_010828, NM_008102, NM_021451, NM_007702, NM_028679, NM_138313            |
| GOTERM_BP_FAT | GO:0010604~positive regulation of macromolecule metabolic process        | 14 | 0,044706227 | NM_008259, NM_013598, NM_153553, NM_001122733, NM_015743, NM_007922, NM_009719, NM_011307, NM_008700, NM_010234, NM_010828, NM_153786, NM_010663, NM_008021 |
| GOTERM_BP_FAT | GO:0040012~regulation of locomotion                                      | 5  | 0,044980781 | NM_007903, NM_009215, NM_009129, NM_199465, NM_008002                                                                                                       |
| GOTERM_BP_FAT | GO:0019953~sexual reproduction                                           | 10 | 0,045995382 | NM_025727, NM_013598, NM_001039385, NM_021879, NM_009370, NM_001122733, NM_009061, NM_001159487, NM_013498, NM_198418                                       |
| GOTERM_BP_FAT | GO:0003013~circulatory system process                                    | 5  | 0,046238115 | NM_007903, NM_013732, NM_007429, NM_008102, NM_010933                                                                                                       |
| GOTERM_BP_FAT | GO:0008015~blood circulation                                             | 5  | 0,046238115 | NM_007903, NM_013732, NM_007429, NM_008102, NM_010933                                                                                                       |
| GOTERM_BP_FAT | GO:0048562~embryonic organ morphogenesis                                 | 6  | 0,04655517  | NM_015743, NM_009370, NM_009323, NM_026571, NM_008002, NM_001159487                                                                                         |
| GOTERM_BP_FAT | GO:0045935~positive regulation of nucleobase, nucleoside, nucleotide and | 12 | 0,046684792 | NM_010828, NM_008259, NM_008970, NM_153553, NM_015743, NM_153786, NM_007922, NM_009719, NM_008021, NM_011307,                                               |

---

|               |                                |   |             |                                                   |
|---------------|--------------------------------|---|-------------|---------------------------------------------------|
|               | nucleic acid metabolic process |   |             | NM_008700, NM_010234                              |
|               |                                |   |             | NM_025727, NM_013598, NM_021879, NM_009370,       |
| GOTERM_BP_FAT | GO:0007276~gamete generation   | 9 | 0,049003144 | NM_001122733, NM_009061, NM_001159487, NM_013498, |
|               |                                |   |             | NM_198418                                         |

---
